# Supplementary material for: Cultivar-specific gene modulation in Vitis vinifera: analysis of the promoters regulating the expression of WOX transcription factors
Source: PubMed Central journal article supplement (PMC5372460; doi:10.1038/srep45670), 2017-03-30
Supplement: srep45670-s1.pdf [file srep45670-s1.pdf]

# Cultivar-specific gene modulation in *Vitis vinifera*: analysis of the promoters regulating the expression of WOX transcription factors.

Paolo Boccacci, Anita Mela, Catalina Pavez Mina, Walter Chitarra, Irene Perrone, Ivana Gribaudo, Giorgio Gambino

## Supplementary Figures

**Supplementary Figure S1.** Sequence Alignment by Clustal MUSCLE tool (<http://www.ebi.ac.uk/Tools/msa/muscle/>) of the promoters sequences cloned from ‘Chardonnay’ (CH) and ‘Cabernet Sauvignon’ (CS) of the genes *VvWOX1*, *VvWOX4*, *VvWOX6*, *VvWOX9* and *VvWOX13C*. The mutations between the sequences isolated from the two cultivars were underlined in green.

### *pVvWOX1*

```
pVvWOX1_CH      GGGCGTAATGTATGGTTTACAACAAAAGAAAAAGTCTGCAATTTGGATTTTCGGAAAGTG
pVvWOX1_CS      GGGCGTAATGTATGGTTTACAACAAAAGAAAAAGTCTGCAATTTGGATTTTCGGAAAGTG
*****

pVvWOX1_CH      AAATACATGTACTCCTAAATCAGATAAGGGGTTCCAAAGCTCACTATATATTTGAACTCA
pVvWOX1_CS      AAATACATGTACTCCTAAATCAGATAAGGGGTTCCAAAGCTCACTATATATTTGAACTCA
*****

pVvWOX1_CH      TATTTGCCGGAAAATTTTCAGATTCAATGGAGTCTTTTGTGTTGTTGAGAGATAGGGAGTT
pVvWOX1_CS      TATTTGCCGGAAAATTTTCAGATTCAATGGAGTCTTTTGTGTTGTTGAGAGATAGGGAGTT
*****

pVvWOX1_CH      TTTGTTCTATACTCCTATACTTGTGGAATTTCTGTGAATATCTCATTTTGGCTACCTCTT
pVvWOX1_CS      TTTGTTCTATACTCCTATACTTGTGGAATTTCTGTGAATATCTCATTTTGGCTACCTCTT
*****

pVvWOX1_CH      ATTTCTCCATTTTTCACCGCAAATCGTTGCTATTCTTCTGTAAAGCCTCTCTCACCAA
pVvWOX1_CS      ATTTCTCCATTTTTCACCGCAAATCGTTGCTATTCTTCTGTAAAGCCTCTCTCACCAA
*****

pVvWOX1_CH      TCGCCCCCTGGTGTCTCAACCATCTCTCTTCCCTTCCACCATGTGCGTAGAGTAGTACTA
pVvWOX1_CS      TCGCCCCCTGGTGTCTCAACCATCTCTCTTCCCTTCCACCATGTGCGTAGAGTAGTACTA
*****

pVvWOX1_CH      GCTTTGGACTTGGGTTTTGAGTCTATCCCTGGCCCATCTAGGGCATGGAATTTTTCGCT
pVvWOX1_CS      GCTTTGGACTTGGGTTTTGAGTCTATCCCTGGCCCATCTAGGGCATGGAATTTTTCGCT
*****

pVvWOX1_CH      CCTTCTGCCTCTTTGAAGCCCAAGCCTGAGCTGACCCATGACCTAGTTCGCATTCCAACC
pVvWOX1_CS      CCTTCTGCCTCTTTGAAGCCCAAGCCTGAGCTGACCCATGACCTAGTTCGCATTCCAACC
*****

pVvWOX1_CH      TTTCTAAATACAGCCAACCTGCATGTCCATATCAATCTTCAAATCCATGGCAGCTTGTGG
pVvWOX1_CS      TTTCTAAATACAGCCAACCTGCATGTCCATATCAATCTTCAAATCCATGGCAGCTTGTGG
*****
```

pVvWOX1\_CH ATGAGGTGGTAATGTCGTGGAACTTGTGGATCAGAGCTCTTGAATCTTCTCAAAGCCAT  
pVvWOX1\_CS ATGAGGTGGTAATGTCGTGGAACTTGTGGATCAGAGCTCTTGAATCTTCTCAAAGCCAT  
\*\*\*\*\*

pVvWOX1\_CH CTTTCTAGGCTCCAAAATGAGTATGTGGTACAATATTTTTAAAAATATATCTATTTACATA  
pVvWOX1\_CS CTTTCTAGGCTCCAAAATGAGTATGTGGTACAATATTTTTAAAAATATATCTATTTACATA  
\*\*\*\*\*

pVvWOX1\_CH TAACAACATATGGCTTTGGAGCGCTTGAGTGGCACTCAAAGCTATCCTCTCATTTTACTAC  
pVvWOX1\_CS TAACAACATATGGCTTTGGAGCGCTTGAGTGGCACTCAAAGCTATCCTCTCATTTTACTAC  
\*\*\*\*\*

pVvWOX1\_CH TTGCTGGGGTTTTGGTGCAAAAAGATTCAATAGATGGTTACACGTACAAGTAAAATGAAAA  
pVvWOX1\_CS TTGCTGGGGTTTTGGTGCAAAAAGATTCAATAGATGGTTACACGTACAAGTAAAATGAAAA  
\*\*\*\*\*

pVvWOX1\_CH AGAGAATGTTGTATGCCTCTACCTACAAGTGAAGTAGAAATAAATAATTATTGAACAAT  
pVvWOX1\_CS AGAGAATGTTGTATGCCTCTACCTACAAGTGAAGTAGAAATAAATAATTATTGAACAAT  
\*\*\*\*\*

pVvWOX1\_CH GATGATATGAAAAAGGGCAGATATAGATGGGCATGTACACTAACGACTCAAGAATTGAAT  
pVvWOX1\_CS GATGATATGAAAAAGGGCAGATATAGATGGGCATGTACACTAACGACTCAAGAATTGAAT  
\*\*\*\*\*

pVvWOX1\_CH CATTCTTCATAATGGAGCCATGGGTGGGGGGGTGCTGAAGCTGTTGAAGCTAAGGGGCT  
pVvWOX1\_CS CATTCTTCATAATGGAGCCATGGGTGGGGGGGTGCTGAAGCTGTTGAAGCTAAGGGGCT  
\*\*\*\*\*

pVvWOX1\_CH ATGCATACCCTACCTTCATGGACATGGACATCTCAAAAAATGAAATAAGGAGAGAAGAGA  
pVvWOX1\_CS ATGCATACCCTACCTTCATGGACATGGACATCTCAAAAAATGAAATAAGGAGAGAAGAGA  
\*\*\*\*\*

pVvWOX1\_CH GCAGCAGCAGAGAAGATTCCAAATCAGACCCTGCAAATTTGATAGCACGTAAAAGGTGTTA  
pVvWOX1\_CS GCAGCAGCAGAGAAGATTCCAAATCAGACCCTGCAAATTTGATAGCACGTAAAAGGTGTTA  
\*\*\*\*\*

pVvWOX1\_CH TATCATTCTATCACCATAGGTTAACCTAAAGGACAATAATCTATAGGATATAAAACAAAG  
pVvWOX1\_CS TATCATTCTATCACCATAGGTTAACCTAAAGGACAATAATCTATAGGATATAAAACAAAG  
\*\*\*\*\*

pVvWOX1\_CH CTATATTATTGAAAGGACAAAGGTGTGAATGGAGGGAGAGAGAGAGAAGAGGGTAGAAAA  
pVvWOX1\_CS CTATATTATTGAAAGGACAAAGGTGTGAATGGAGGGAGAGAGAGAGAAGAGGGTAGAAAA  
\*\*\*\*\*

pVvWOX1\_CH GGAATGTAATAAAAGAACCGTACAGAGAGAGAGAGAGAGAGAGAAAGAGAGAGAGACAA  
pVvWOX1\_CS GGAATGTAATAAAAGAACCGTACAGAGAGAGAGAGAGAGAGAGAGAAAGAGAGAGAGACAA  
\*\*\*\*\*

pVvWOX1\_CH AGGAGAGGGGTGTGAGAGAGGGGCAGTTCGGATTTAGAATAAGTGTGAAAGGCACGAGAC  
pVvWOX1\_CS AGGAGAGGGGTGTGAGAGAGGGGCAGTTCGGATTTAGAATAAGTGTGAAAGGCACGAGAC  
\*\*\*\*\*

pVvWOX1\_CH AGTGAGAGCAACAATAAATGAGAGAAAGAAGGTGATGAGGCTTATGATAACCCTCATGAT  
pVvWOX1\_CS AGTGAGAGCAACAATAAATGAGAGAAAGAAGGTGATGAGGCTTATGATAACCCTCATGAT  
\*\*\*\*\*

pVvWOX1\_CH CGTCACGTCGTTTTTCATTCGCTTCTCCCGATAACTCCCAGAATTCCACGCTTCTCTCT  
pVvWOX1\_CS CGTCACGTCGTTTTTCATTCGCTTCTCCCGATAACTCCCAGAATTCCACGCTTCTCTCT  
\*\*\*\*\*

pVvWOX1\_CH CTTCTCTCGCTTCTTCTCCTCTGCTTTTTTGCCTTTGCTTTTTGTCCATTTTAGACA  
pVvWOX1\_CS CTTCTCTCGCTTCTTCTCCTCTGCTTTTTTGCCTTTGCTTTTTGTCCATTTTAGACA  
\*\*\*\*\*

pVvWOX1\_CH CACACACTCTCTCTCTCCCCCTTTCTTCTCTCTCCTGATATAGCCCAGTCAACCTCATG  
pVvWOX1\_CS CACACACTCTCTCTCTCCCCCTTTCTTCTCTCTCCTGATATAGCCCAGTCAACCTCATG  
\*\*\*\*\*

|            |                                                                        |
|------------|------------------------------------------------------------------------|
| pVvWOX1_CH | TCTTCCTCACTTTGTTCCATTTTAAACCAACACCATTCTCTTTCTCCCATCCATTGGTCA           |
| pVvWOX1_CS | TCTTCCTCACTTTGTTCCATTTTAAACCAACACCATTCTCTTTCTCCCATCCATTGGTCA<br>*****  |
| pVvWOX1_CH | ATCTTCATCTCTGAAACCCTGAAACTCAAACGCTCTCTATTCGGCTCACCTCTCCCATTT           |
| pVvWOX1_CS | ATCTTCATCTCTGAAACCCTGAAACTCAAACGCTCTCTATTCGGCTCACCTCTCCCATTT<br>*****  |
| pVvWOX1_CH | CAACTAAATCACTTTTTCATTACCATCAAATACATACTACTTGTGACCCATTTCTGGTTTC          |
| pVvWOX1_CS | CAACTAAATCACTTTTTCATTACCATCAAATACATACTACTTGTGACCCATTTCTGGTTTC<br>***** |
| pVvWOX1_CH | TCCTTCCAGAGTAAAAGACA ACTTGGTGGAGCATTATATATCTACAGTTGTAGACCACC           |
| pVvWOX1_CS | TCCTTCCAGAGTAAAAGACA ACTTGGTGGAGCATTATATATCTACAGTTGTAGACCACC<br>*****  |
| pVvWOX1_CH | TCCACGCCAATCCACCATTGCTTGCTCCATTCCCATTTGATCTGCAACTCAAAAACCTAA           |
| pVvWOX1_CS | TCCACGCCAATCCACCATTGCTTGCTCCATTCCCATTTGATCTGCAACTCAAAAACCTAA<br>*****  |
| pVvWOX1_CH | TTTTCAGCCCAATATCATATATCATATGATTATATGCTAGTTGGGAAACAAAAACATTC            |
| pVvWOX1_CS | TTTTCAGCCCAATATCATATATCATATGATTATATGCTAGTTGGGAAACAAAAACATTC<br>*****   |
| pVvWOX1_CH | ATGATTAGACTCTCCTTCTGTTCATTACTCATCTCTACACCCAAAATCCTTTCCTCTAG            |
| pVvWOX1_CS | ATGATTAGACTCTCCTTCTGTTCATTACTCATCTCTACACCCAAAATCCTTTCCTCTAG<br>*****   |
|            | -1                                                                     |
| pVvWOX1_CH | TTTGGTGTCTTTACCCTCCACCTTCAAAGCAAAGCAACTTACA                            |
| pVvWOX1_CS | TTTGGTGTCTTTACCCTCCACCTTCAAAGCAAAGCAACTTACA<br>*****                   |

Percentage of identity between the two sequences: 99.8%.

### **pVvWOX4**

|            |                                                                        |
|------------|------------------------------------------------------------------------|
| pVvWOX4_CH | GTGATTGATGGGGGTGGTGTGCATGGAATCTGCTTAAGGTAGGCCAAAACATGGACTCAC           |
| pVvWOX4_CS | GTGATTGATGGGGGTGGTGTGCATGGAATCTGCTTAAGGTAGGCCAAAACATGGACTCAC<br>*****  |
| pVvWOX4_CH | ATCCTATATAATCTCTGGAATGTCAACATTTCTATGATTATCCTAGGCATTCACGTCCAT           |
| pVvWOX4_CS | ATCCTATATAATCTCTGGAATGTCAACATTTCTATGATTATCCTAGGCATTCACGTCCAT<br>*****  |
| pVvWOX4_CH | TTAGAATGACATCTGCCCAATAGAATTGAAGAGGTCATCTTCATTTCAAAGTTACTTTGC           |
| pVvWOX4_CS | TTAGAATGACATCTGCCCAATAGAATTGAAGAGGTCATCTTCATTTCAAAGTTACTTTGC<br>*****  |
| pVvWOX4_CH | TTTTTCTAAGTACACAATTGGGATATAAAATTCACCGTGCAGGTTAATTATACACCAAAA           |
| pVvWOX4_CS | TTTTTCTAAGTACACAATTGGGATATAAAATTCACCGTGCAGGTTAATTATACACCAAAA<br>*****  |
| pVvWOX4_CH | TAACCATACAGGTAATTTCTCTAAAAAGGGCTGGCTGTTGTAGTAGTTTCGCTTTCAAATT          |
| pVvWOX4_CS | TAACCATACAGGTAATTTCTCTAAAAAGGGCTGGCTGTTGTAGTAGTTTCGCTTTCAAATT<br>***** |
| pVvWOX4_CH | TTAATTAATCTGTACCATATTATCATCAACAGTTGAGAAGAAATTAACACAGTGTACGCG           |
| pVvWOX4_CS | TTAATTAATCTGTACCATATTATCATCAACAGTTGAGAAGAAATTAACACAGTGTACGCG<br>*****  |
| pVvWOX4_CH | TATCCTTGTGATATCAAGCTGGATGGATTATATGGATATATGTCCCTCATGTCGCTTACT           |
| pVvWOX4_CS | TATCCTTGTGATATCAAGCTGGATGGATTATATGGATATATGTCCCTCATGTCGCTTACT<br>*****  |
| pVvWOX4_CH | CTCTGTAGCTTCTGCATGGAGAGTTTCAAATGAGCTGTTTCAAATCAACATCCAAACA             |
| pVvWOX4_CS | CTCTGTAGCTTCTGCATGGAGAGTTTCAAATGAGCTGTTTCAAATCAACATCCAAACA<br>*****    |

```

*****
pVvWOX4_CH      TCACGCTGAGTATTTGTCAGTGTCAATTGCCTTAATTCGTACTATGTTAGGGAAGGAAGG
pVvWOX4_CS      TCACGCTGAGTATTTGTCAGTGTCAATTGCCTTAATTCGTACTATGTTAGGGAAGGAAGG
*****

pVvWOX4_CH      AAGGAAGGAAGGAAGGAAGGAGAAATTATGGGTACATCAGACTGGCAACCCAATCCTTT
pVvWOX4_CS      AAGGAAGGAAGGAAGGAAGGAGAAATTATGGGTACATCAGACTGGCAACCCAATCCTTT
*****

pVvWOX4_CH      CGAACAAGTATATTCATATTTACCGGGTGGGAAGGGGGAGAGGAGGATCCATAGCAGGTG
pVvWOX4_CS      CGAACAAGTATATTCATATTTACCGGGTGGGAAGGGGGAGAGGAGGATCCATAGCAGGTG
*****

pVvWOX4_CH      GGTGGATGTTAGTTACAGAACAATCATGCCTGGAGAATACTTGGCTAGATTCACGCATGG
pVvWOX4_CS      GGTGGATGTTAGTTACAGAACAATCATGCCTGGAGAATACTTGGCTAGATTCACGCATGG
*****

pVvWOX4_CH      AGTGCCTTTGATTGCTGATTC AAGGAGGAATAATAATGTTTGAGGTCTGAAATGGCCCCA
pVvWOX4_CS      AGTGCCTTTGATTGCTGATTC AAGGAGGAATAATAATGTTTGAGGTCTGAAATGGCCCCA
*****

pVvWOX4_CH      GTTGAATTTTTTCTTAACTTCTTCTAGATATCAGGTAGGTTTCATCAAGAAATTGTGGTTT
pVvWOX4_CS      GTTGAATTTTTTCTTAACTTCTTCTAGATATCAGGTAGGTTTCATCAAGAAATTGTGGTTT
*****

pVvWOX4_CH      TTGATTCCTTGGTCATATGTCTGTCACCTCAGAGAACACCCGACAATCCCTCTTCT
pVvWOX4_CS      TTGATTCCTTGGTCATATGTCTGTCACCTCAGAGAACACCCGACAATCCCTCTTCT
*****

pVvWOX4_CH      CTTATTCAATCAAACCCACATCCCCGTATACCTCCAAAGATCCACGACACAAGATGTG
pVvWOX4_CS      CTTATTCAATCAAACCCACATCCCCGTATACCTCCAAAGATCCACGACACAAGATGTG
*****

pVvWOX4_CH      GCTGGAATTGGCCTGTAATGCTAAATGTCAAAGTATACAGATTACATACTGTACAAAAGG
pVvWOX4_CS      GCTGGAATTGGCCTGTAATGCTAAATGTCAAAGTATACAGATTACATACTGTACAAAAGG
*****

pVvWOX4_CH      GTCAGAAGTCATGCTGTCTTGAACCTTTCCAAACAAAGACGCGAGGGTTTAGGGTCATA
pVvWOX4_CS      GTCAGAAGTCATGCTGTCTTGAACCTTTCCAAACAAAGACGCGAGGGTTTAGGGTCATA
*****

pVvWOX4_CH      TTTGCGGGGATTGAAGGATTTAGTGCACCCAAGACTCTCCACATTAGCCCCCAAGAAA
pVvWOX4_CS      TTTGCGGGGATTGAAGGATTTAGTGCACCCAAGACTCTCCACATTAGCCCCCAAGAAA
*****

pVvWOX4_CH      GACGCTCGTATGCGTTAGATGCTATAGAAGGAGAATCGAAAAGGCCACAGAAATTTGCAA
pVvWOX4_CS      GACGCTCGTATGCGTTAGATGCTATAGAAGGAGAATCGAAAAGGCCACAGAAATTTGCAA
*****

pVvWOX4_CH      TAATTTGTGAGAGAGTTTATGAATGCAGCACATGTGTGGTGTATATCTCACTTGATAATT
pVvWOX4_CS      TAATTTGTGAGAGAGTTTATGAATGCAGCACATGTGTGGTGTATATCTCACTTGATAATT
*****

pVvWOX4_CH      GCCAATCAGTGAAGAAGAAGC TGTGATTGCGGTTCATCAGGACAACCTGTAACAATAGCTTT
pVvWOX4_CS      GCCAATCAGTGAAGAAGAAGC -----
*****

pVvWOX4_CH      ACTCAAGACTTGATCATAATTG TGTGAAAAGACAATAAGATAAAATTTACCCCATGTAAAA
pVvWOX4_CS      ----- TGTGAAAAGACAATAAGATAAAATTTACCCCATGTAAAA
*****

pVvWOX4_CH      TACGTAGAAGATTGAGATATATATATTAGGTGATGAGTGGGAGGGTGAAGAATTTGGAAT
pVvWOX4_CS      TACGTAGAAGATTGAGATATATATATTAGGTGATGAGTGGGAGGGTGAAGAATTTGGAAT
*****

pVvWOX4_CH      ACAAAAATGAGATGAAAAGTG GGGTTGATGGGTTTATACTATTTGGGAAATTTGGAGCTAC
pVvWOX4_CS      ACAAAAATGAGATGAAAAGTG GGGTTGATGGGTTTATACTATTTGGGAAATTTGGAGCTAC
*****

```

```

pVvWOX4_CH      AGTTCCCAAAGAAGGGGATATGGAATTGAGATAGATTTGTTTGTGGGTTTTTTTTTTTTTT
pVvWOX4_CS      AGTTCCCAAAGAAGGGGATATGGAATTGAGATAGATTTGTTTGTGGGTTTTTTTTTTTTTT
*****

pVvWOX4_CH      TTTTTTCTCTCTTTTTCTTTTTTCAACATCTCTACCACTTAAAGACGGCCTCAGTTC
pVvWOX4_CS      TTTTTTCTCTCTTTTTCTTTTTTCAACATCTCTACCACTTAAAGACGGCCTCAGTTC
***** *

pVvWOX4_CH      CAGTCACCATATCCGTATCTTGAAAAGCAAAGAGTCCCATATTCAAGTTTGGGATTGG
pVvWOX4_CS      CAGTCACCATATCCGTATCTTGAAAAGCAAAGAGTCCCATATTCAAGTTTGGGATTGG
*****

pVvWOX4_CH      AGGAATTTTTTTTCATTCCTCTCCCTCCATCGCCCTCTCTGCTCACTTTATAGAGAAAA
pVvWOX4_CS      AGGAATTTTTTTTCATTCCTCTCCCTCCATCGCCCTCTCTGCTCACTTTATAGAGAAAA
*****

pVvWOX4_CH      GTTAAGAATGAGAGCCAAAGAGGCCACCGAAAAGCATGGACACCTTATCATGAAAGCAAG
pVvWOX4_CS      GTTAAGAATGAGAGCCAAAGAGGCCACCGAAAAGCATGGACACCTTATCATGAAAGCAAG
*****

pVvWOX4_CH      AAAAAACGACCGATTTGACGGGCCAACACACGCATATACACACACCACACGCTCATAACA
pVvWOX4_CS      AAAAAACGACCGATTTGACGGGCCAACACACGCATATACACACACCACACGCTCATAACA
*****

pVvWOX4_CH      ATATTTCTCATTCTCTCTCTCTCTTTCTCTCTCTCTATCTTTCTTTTTTGATGGAAAT
pVvWOX4_CS      ATATTTCTCATTCTCTCTCTCTCTTTCTCTCTCTCTATCTTTCTTTTTTGATGGAAAT
*****

pVvWOX4_CH      CCTAAGTCAACCTCACCTCATCATTTGGTCTTGTTCTTCTAAGCACCACTCATATCCC
pVvWOX4_CS      CCTAAGTCAACCTCACCTCATCATTTGGTCTTGTTCTTCTAAGCACCACTCATATCCC
*****

pVvWOX4_CH      ACTTTCTTTTCTTCTATCTCTCTCTCTCATCTTCCATATAAATTACCACCTCTCTATCATT
pVvWOX4_CS      ACTTTCTTTTCTTCTATCTCTCTCTCTCATCTTCCATATAAATTACCACCTCTCTATCATT
*****

-1
pVvWOX4_CH      CAATCCTCCCC
pVvWOX4_CS      CAATCCTCCCC
*****

```

Percentage of identity between the two sequences: 96.7%.

### **pVvWOX6**

```

pVvWOX6_CH      TGTATACCAGTGGCAACATTCATTAACCTGGAGTCTGAAGGAGCAATAGTAACGGGATAAA
pVvWOX6_CS      TGTATACCAGTGGCAACATTCATTAACCTGGAGTCTGAAGGAGCAATAGTAACGGGATAAA
*****

pVvWOX6_CH      TTTTCCATTGGGTATAAAATTAGGCTTTCTTAATTACCCCTGCAACTATCCTTCTGTGCT
pVvWOX6_CS      TTTTCCATTGGGTATAAAATTAGGCTTTCTTAATTACCCCTGCAACTATCCTTCTGTGCT
*****

pVvWOX6_CH      ACCTGATGAAACAAAAGCGAGGGTATCACAAGCCCAATGACAACAGTCTCCTTTGACCA
pVvWOX6_CS      ACCTGATGAAACAAAAGCGAGGGTATCACAAGCCCAATGACAACAGTCTCCTTTGACCA
*****

pVvWOX6_CH      TGCACGAGGAGACCTTATTGAGCATATACAATTCCATCTACATTTTTTTTTTTTTTTTT
pVvWOX6_CS      TGCACGAGGAGACCTTATTGAGCATATACAATTCCATCTACA--TTTTTTTTTTTTTTTT
*****

pVvWOX6_CH      TGCTGCTCTTTGAAATGAGCAGTCCATCATTCAGTACACCAGCTCTTGGAAATCCTATAC
pVvWOX6_CS      TGCTGCTCTTTGAAATGAGCAGTCCATCATTCAGTACACCAGCTCTTGGAAATCCTATAC
*****

```

pVvWOX6\_CH TTGCTTTTATTTTTAAATTCATTTTACTTCACTGCAATCAGATATCAATCCTTTTATAC  
pVvWOX6\_CS TTGCTTTTATTTTTAAATTCATTTTACTTCACTGCAATCAGATATCAATCCTTTTATAC  
\*\*\*\*\*

pVvWOX6\_CH TAGTTTGAATTGCTTGGATTTTTATGTGGAAAAGATCTAAACTGACTGAAATCTCGAAT  
pVvWOX6\_CS TAGTTTGAATTGCTTGGATTTTTATGTGGAAAAGATCTAAACTGACTGAAATCTCGAAT  
\*\*\*\*\*

pVvWOX6\_CH GTTGAAAAATTTAACTGCCCCTAAAACCTCAGAAGAGTAAACATTGTTAGCACATGGACAA  
pVvWOX6\_CS GTTGAAAAATTTAACTGCCCCTAAAACCTCAGAAGAGTAAACATTGTTAGCACATGGACAA  
\*\*\*\*\*

pVvWOX6\_CH AGTTGAGCAGAACTTCTCACTCAGATGCAGAATCCTTGAACCTGTCTAGTTTCAAAGAA  
pVvWOX6\_CS AGTTGAGCAGAACTTCTCACTCAGATGCAGAATCCTTGAACCTGTCTAGTTTCAAAGAA  
\*\*\*\*\*

pVvWOX6\_CH CTGCCAGCTTTGAAGTAAGAAGTAAGATGAATTTAACAACATTCCAAAGCTAGAAATCA  
pVvWOX6\_CS CTGCCAGCTTTGAAGTAAGAAGTAAGATGAATTTAACAACATTCCAAAGCTAGAAATCA  
\*\*\*\*\*

pVvWOX6\_CH AAATCATTATGCCTCTAATGCAGAAACAGACCTCCTCTGGAATCACAATCTCAGCTCCT  
pVvWOX6\_CS AAATCATTATGCCTCTAATGCAGAAACAGACCTCCTCTGGAATCACAATCTCAGCTCCT  
\*\*\*\*\*

pVvWOX6\_CH ACATCTGGTGGCAGGTGCTTCATGTATCTTGTCAATCTTGTGTGTATTCAAACACAGAT  
pVvWOX6\_CS ACATCTGGTGGCAGGTGCTTCATGTATCTTGTCAATCTTGTGTGTATTCAAACACAGAT  
\*\*\*\*\*

pVvWOX6\_CH AATAAAACAATAATCTTCAGGGCTTCCATTTTCCATAGTTCAATTGTTTCAAGGCATGAG  
pVvWOX6\_CS AATAAAACAATAATCTTCAGGGCTTCCATTTTCCATAGTTCAATTGTTTCAAGGCATGAG  
\*\*\*\*\*

pVvWOX6\_CH ACTTGAACCTGAAAACAATGCATCAGATGGGAGAATCTACCTGGCATGCATGGGCCAGTC  
pVvWOX6\_CS ACTTGAACCTGAAAACAATGCATCAGATGGGAGAATCTACCTGGCATGCATGGGCCAGTC  
\*\*\*\*\*

pVvWOX6\_CH TGGCCACAGTTTCAGGGCATGTACTGGCCACAGCTTGCTTCATAGCAGTAAACATGTACT  
pVvWOX6\_CS TGGCCACAGTTTCAGGGCATGTACTGGCCACAGCTTGCTTCATAGCAGTAAACATGTACT  
\*\*\*\*\*

pVvWOX6\_CH CAATTTGCCAGTAGTCTGAACATGGCATTGCACTTTTGAATTTATTTAGACAAAAAATA  
pVvWOX6\_CS CAATTTGCCAGTAGTCTGAACATGGCATTGCACTTTTGAATTTATTTAGACAAAAAATA  
\*\*\*\*\*

pVvWOX6\_CH ACAATGTCATGCTCATTTCTTTTCCCCCTTTTTTTTTTGGGCAAACATATCAACACCTC  
pVvWOX6\_CS ACAATGTCATGCTCATTTCTTTTCCCCCTTTTTTTTTTGGGCAAACATATCAACACCTC  
\*\*\*\*\*

pVvWOX6\_CH CAGTAAAAATAGAAGCAGAAATTAATAGTGATATTTGTCACCTGCCATTATCACTCATGTC  
pVvWOX6\_CS CAGTAAAAATAGAAGCAGAAATTAATAGTGATATTTGTCACCTGCCATTATCACTCATGTC  
\*\*\*\*\*

pVvWOX6\_CH TTTTTTAGGTTTTCTTTTATATTCTCCCTACCCAAAAAGAAAAGTATGCCTGCTTGCT  
pVvWOX6\_CS TTTTTTAGGTTTTCTTTTATATTCTCCCTACCCAAAAAGAAAAGTATGCCTGCTTGCT  
\*\*\*\*\*

pVvWOX6\_CH GATAAATAATTTTCCACCCTCTGTACTGAAAGCTCATCACCATATACAGACTGTCCTGG  
pVvWOX6\_CS GATAAATAATTTTCCACCCTCTGTACTGAAAGCTCATCACCATATACAGACTGTCCTGG  
\*\*\*\*\*

pVvWOX6\_CH ATTCCCCCGGATACCTTAGGCCATAGACACTTAACTATGAAGAGATGGATCAAAACTCA  
pVvWOX6\_CS ATTCCCCCGGATACCTTAGGCCATAGACACTTAACTATGAAGAGATGGATCAAAACTCA  
\*\*\*\*\*

pVvWOX6\_CH TGACCTCTGAAAGTTGAAGTCTTGCAGCTGATAATGTGGATATATTAGTAACCACAACA  
pVvWOX6\_CS TGACCTCTGAAAGTTGAAGTCTTGCAGCTGATAATGTGGATATATTAGTAACCACAACA  
\*\*\*\*\*

pVvWOX6\_CH GATTGTTATAAGTAGAGATTATGATCTATGATGTCTAGATTCGCTATATTCCGTGCAT

pVvWOX6\_CS GATTGTTATAAGTAGAGATTATGATCTATGATGTCTAGATTTCGCTATATTTCCGTGCAT  
 \*\*\*\*\*

pVvWOX6\_CH GGGGTTGCCGACAGCAGTAGCAAGAAAGAGTAGGCATATGGAACCAAAAATATTATCGTC  
 pVvWOX6\_CS GGGGTTGCCGACAGCAGTAGCAAGAAAGAGTAGGCATATGGAACCAAAAATATTATCGTC  
 \*\*\*\*\*

pVvWOX6\_CH CCTCAATAATTTTGAATATGAGTAAAGCAAGGCATGCATAATTCAGCCTCTAAATGTCTA  
 pVvWOX6\_CS CCTCAATAATTTTGAATATGAGTAAAGCAAGGCATGCATAATTCAGCCTCTAAATGTCTA  
 \*\*\*\*\*

pVvWOX6\_CH ATCCACAGGTTGGCCAAAGAGGACATTTTGTTCATGTGTTCCATGTCTAGAGAGGT  
 pVvWOX6\_CS ATCCACAGGTTGGCCAAAGAGGACATTTTGTTCATGTGTTCCATGTCTAGAGAGGT  
 \*\*\*\*\*

pVvWOX6\_CH TAGGCCATCTATGACCGGTAGCACAAGCTTCACAACATAATGATAACCAGTTGGACCGCA  
 pVvWOX6\_CS TAGGCCATCTATGACCGGTAGCACAAGCTTCACAACATAATGATAACCAGTTGGACCGCA  
 \*\*\*\*\*

pVvWOX6\_CH TCCTGATAAAAATTTCCAAATCTATTATCTGCATTTAATCAACAATAATATGTTCCAGA  
 pVvWOX6\_CS TCCTGATAAAAATTTCCAAATCTATTATCTGCATTTAATCAACAATAATATGTTCCAGA  
 \*\*\*\*\*

pVvWOX6\_CH ATGATTAGCGGACACAAAAAGGCTAGAAGCTCCATTTTCAAATGGGAACAAAAAAA  
 pVvWOX6\_CS ATGATTAGCGGACACAAAAAGGCTAGAAGCTCCATTTTCAAATGGGAACAAAAAAA  
 \*\*\*\*\*

pVvWOX6\_CH -AAAAGGGGGAGGAAATGAAGGAAAAGGATAAAGAATGAGAGAGAAAGATGGGGTTGT  
 pVvWOX6\_CS GAAAAGGGGGAGGAAATGAAGGAAAAGGATAAAGAATGAGAGAGAAAGATGGGGTTGT  
 \*\*\* \*\*\*\*\*

pVvWOX6\_CH GTCAAGGTTGAAAGGAAGTATACAAAGTGAAGTAGTAATAGTGTAGTGTGGGAGGAGAA  
 pVvWOX6\_CS GTCAAGGTTGAAAGGAAGTATACAAAGTGAAGTAGTAATAGTGTAGTGTGGGAGGAGAA  
 \*\*\*\*\*

pVvWOX6\_CH GAGGCAAAGAAGCAAACAACACTACAGGTCATAATATGGTCACGTCGTTGTTATCCCCGC  
 pVvWOX6\_CS GAGGCAAAGAAGCAAACAACACTACAGGTCATAATATGGTCACGTCGTTGTTATCCCCGC  
 \*\*\*\*\*

pVvWOX6\_CH CTTCCAATAACTCCCAGAATTCACGCTTTGTATGCTCCCCCTCTGCTTTTGTCTTTGTCC  
 pVvWOX6\_CS CTTCCAATAACTCCCAGAATTCACGCTTTGTATGCTCCCCCTCTGCTTTTGTCTTTGTCC  
 \*\*\*\*\*

pVvWOX6\_CH TTGTTACTACATACCCCGTCTCTCACAATTCATAAATAAGAGACCATGGTCAACCTAC  
 pVvWOX6\_CS TTGTTACTACATACCCCGTCTCTCACAATTCATAAATAAGAGACCATGGTCAACCTAC  
 \*\*\*\*\*

pVvWOX6\_CH TATATTCCTTGTTCCTTTTCACTTTTCTCTGTTTCAAACCAGAACTCTTCTTTCTCC  
 pVvWOX6\_CS TATATTCCTTGTTCCTTTTCACTTTTCTCTGTTTCAAACCAGAACTCTTCTTTCTCC  
 \*\*\*\*\*

pVvWOX6\_CH ATTTAATCTCTCATTCTTTCTTGTCCACTTTACACCTCTGAAGCTCTCAACGCCCTCT  
 pVvWOX6\_CS ATTTAATCTCTCATTCTTTCTTGTCCACTTTACACCTCTGAAGCTCTCAACGCCCTCT  
 \*\*\*\*\*

pVvWOX6\_CH TCTTGTCCACTCTACTACCCATTTCCCTACGAAGCACACTCTTAGTACCATGTGGACG  
 pVvWOX6\_CS TCTTGTCCACTCTACTACCCATTTCCCTACGAAGCACACTCTTAGTACCATGTGGACG  
 \*\*\*\*\*

-1

Percentage of identity between the two sequences: 98.8%.

**pVvWOX9**

pVvWOX9\_CH CCTTTCTCTGACTTTATTCGCTCCATCTTCACATGCACTCCCCCTTTTCTTTTTTCT  
 pVvWOX9\_CS CCTTTCTCTGACTTTATTCGCTCCATCTTCACATGCACTCCCCCTTTTCTTTTTTCT

```

*****
pVvWOX9_CH      CTTCTTTATTCACCTCGATATATGTCACATTTACCCGGTTAATTCCTTATTGCTATGTCGC
pVvWOX9_CS      CTTCTTTATTCACCTCGATATATGTCACATTTACCCGGTTAATTCCTTATTGCTATGTCGC
*****

pVvWOX9_CH      CGACATACGTCCATGATCTAATTCATTATGCTACAAATCAAGAAGGGATTAATTCATA
pVvWOX9_CS      CGACATACGTCCATGATCTAATTCATTATGCTACAAATCAAGAAGGGATTAATTCATA
*****

pVvWOX9_CH      ATGGCTTGAACATAAAGAACTAGAAAAGTGCACGACTAGTTAAAAAAGCCTTCTCCCCCGC
pVvWOX9_CS      ATGGCTTGAACATAAAGAACTAGAAAAGTGCACGACTAGTTAAAAAAGCCTTCTCCCCCGC
*****

pVvWOX9_CH      TACATGCAACACAAATAACAGGCACGTAGCAAGAGGCAACATGCTCGGCCACCACCACCA
pVvWOX9_CS      TACATGCAACACAAATAACAGGCACGTAGCAAGAGGCAACATGCTCGGCCACCACCACCA
*****

pVvWOX9_CH      ACAATTCATTGACTATAACATCAACTTTTTCTTAAAGGTTGAATTTTTAGTCTTTTACA
pVvWOX9_CS      ACAATTCATTGACTATAACATCAACTTTTTCTTAAAGGTTGAATTTTTAGTCTTTTACA
*****

pVvWOX9_CH      TAAATGATTAACATTTGTTCTCACAAAAAATGTGATCAGCCTACATGGTACCAGTACCAT
pVvWOX9_CS      TAAATGATTAACATTTGTTCTCACAAAAAATGTGATCAGCCTACATGGTACCAGTACCAT
*****

pVvWOX9_CH      GTCCACACCCTACCTGAAATTTACGCCACACCAATATTTGCCTCGCATACTATGTCA
pVvWOX9_CS      GTCCACACCCTACCTGAAATTTACGCCACACCAATATTTGCCTCGCATACTATGTCA
*****

pVvWOX9_CH      CTTTTATAACATTCACACTGCACTTGTTCATCTGCAATATTAATGTAGCTTAGTTTGAA
pVvWOX9_CS      CTTTTATAACATTCACACTGCACTTGTTCATCTGCAATATTAATGTAGCTTAGTTTGAA
*****

pVvWOX9_CH      ATTTTTAAATGATTGAAGAAATTTGGCCTCCACCGCCATCAAATTGATGTCGTTGCCATA
pVvWOX9_CS      ATTTTTAAATGATTGAAGAAATTTGGCCTCCACCGCCATCAAATTGATGTCGTTGCCATA
*****

pVvWOX9_CH      ACCACAATTGTGCCATCACCATCATCAGCTCCATCTCTATCTCTAGCGGCATTTTGAGTG
pVvWOX9_CS      ACCACAATTGTGCCATCACCATCATCAGCTCCATCTCTATCTCTAGCGGCATTTTGAGTG
*****

pVvWOX9_CH      TCCCATTGACTTGTAATCATCTGCTTTACCAAATTTTCTCCTCACAAAATGTTTAAATT
pVvWOX9_CS      TCCCATTGACTTGTAATCATCTGCTTTACCAAATTTTCTCCTCACAAAATGTTTAAATT
*****

pVvWOX9_CH      TGTGGGTCAAACATCTCGATGTGAAAACCTTTGAAAACGAGGAAGAGGTCTTAATGAT
pVvWOX9_CS      TGTGGGTCAAACATCTCGATGTGAAAACCTTTGAAAACGAGGAAGAGGTCTTAATGAT
*****

pVvWOX9_CH      TTTTCTGATTAGGAGACGACTGAAAGACCAGCTAATAGGAGTCAACCAACAATTAATT
pVvWOX9_CS      TTTTCTGATTAGGAGACGACTGAAAGACCAGCTAATAGGAGTCAACCAACAATTAATT
*****

pVvWOX9_CH      GATTGAAAAATATTCAAATATAACAACATTACTGAATTTTAAATATATAGTACTTCATTA
pVvWOX9_CS      GATTGAAAAATATTCAAATATAACAACATTACTGAATTTTAAATATATAGTACTTCATTA
*****

pVvWOX9_CH      ATCCTACTCGTTTCATAAGTCTTCACCAATATTCGTTTGATAGGGTTAATATCCCACTG
pVvWOX9_CS      ATCCTACTCGTTTCATAAGTCTTCACCAATATTCGTTTGATAGGGTTAATATCCCACTG
*****

pVvWOX9_CH      TTTTATTGGTAGTACCATTTGATAAAAAAATGCTATTTCTTGTCGCAACATTTACAAT
pVvWOX9_CS      TTTTATTGGTAGTACCATTTGATAAAAAAATGCTATTTCTTGTCGCAACATTTACAAT
*****

pVvWOX9_CH      AAAGCTAGTAGAACAAATTGAGAAAGGGAGTGCACATTTTCTCATTTAATTGGGATTTA
pVvWOX9_CS      AAAGCTAGTAGAACAAATTGAGAAAGGGAGTGCACATTTTCTCATTTAATTGGGATTTA
*****

```



```

pVvWOX9_CH      ATTAATTTTGATTTTGAATTTT-----TTTTTTTTTTGTTTAAGGAAAGAAAATA
pVvWOX9_CS      ATTAATTTTGATTTTGAATTTTTTTTTTTTTTTTTTTTTTTTTTTTAAAGGAAAGAAAATA
*****

pVvWOX9_CH      AAAGAAGAGGAAGAAGAAGAGGCCCTCGAGTCAATCCAAAGCCCACCTTTGCCAAAATA
pVvWOX9_CS      AAAGAAGAGGAAGAAGAAGAGGCCCTCGAGTCAATCCAAAGCCCACCTTTGCCAAAATA
*****

pVvWOX9_CH      AACCAAACTCGCAATTACTGACCCACCACCTCTTTCCAATCAAACCCCTACAAGGCTCCT
pVvWOX9_CS      AACCAAACTCGCAATTACTGACCCACCACCTCTTTCCAATCAAACCCCTACAAGGCTCCT
*****

pVvWOX9_CH      TGACTTTCAAACACCCCCACCCCATTTATTCCTGCAACAACCTCTTCCATTAGAATAAT
pVvWOX9_CS      TGACTTTCAAACACCCCCACCCCATTTATTCCTGCAACAACCTCTTCCATTAGAATAAT
*****

pVvWOX9_CH      CCCACACTTATATCTACCCTTCACCCCTCCCATTAATACCACTGCAAGCAAACCAAAGTC
pVvWOX9_CS      CCCACACTTATATCTACCCTTCACCCCTCCCATTAATACCACTGCAAGCAAACCAAAGTC
*****

pVvWOX9_CH      ATGAGCAAGGGAATCCTCCCATGGAACAATGAATAGGAGACAAACTCATCAGAGCAG
pVvWOX9_CS      ATGAGCAAGGGAATCCTCCCATGGAACAATGAATAGGAGACAAACTCATCAGAGCAG
*****

pVvWOX9_CH      CCCACCTCTCTAAAGCTATAAAACCCACTCCACTCCGCACCACCCCCTTTTGCATTAAGA
pVvWOX9_CS      CCCACCTCTCTAAAGCTATAAAACCCACTCCACTCCGCACCACCCCCTTTTGCATTAAGA
*****

pVvWOX9_CH      CCCCTTCTCTGTCTCCTCTGATCAAGATTCTAATCTAGCCCAGCATATATGCTTTCCA
pVvWOX9_CS      CCCCTTCTCTGTCTCCTCTGATCAAGATTCTAATCTAGCCCAGCATATATGCTTTCCA
*****

pVvWOX9_CH      TGTTCCCTTTGCTTCTCGTCCGGGGGAATTGGCTTGTACTTTGAGTAGTCCACAAGCATT
pVvWOX9_CS      TGTTCCCTTTGCTTCTCGTCCGGGGGAATTGGCTTGTACTTTGAGTAGTCCACAAGCATT
*****

pVvWOX9_CH      TCAGTTTTAATGCTAAACTGTAAGGAAGGGATGGGAGTGTACTCTCCTTCTTACCTTTAT
pVvWOX9_CS      TCAGTTTTAATGCTAAACTGTAAGGAAGGGATGGGAGTGTACTCTCCTTCTTACCTTTAT
*****

pVvWOX9_CH      ATTTACTTTCATTTCCCTTCTGTTTATCATCTCACAGGCGATTCTGTTGTGGGTTTTG
pVvWOX9_CS      ATTTACTTTCATTTCCCTTCTGTTTATCATCTCACAGGCGATTCTGTTGTGGGTTTTG
*****

pVvWOX9_CH      TCAATTTTTTTATTATGGGTTTTATTATTAGTATTATTATTTTTATTTTATTCTTTGGG
pVvWOX9_CS      TCAATTTTTTTATTATGGGTTTTATTATTAGTATTATTATTTTTATTTTATTCTTTGGG
*****

pVvWOX9_CH      AGATGGGAAAGACTGTTTATTAATTGAAATAAACTGAACACAGGGGTAGGTGAGGAGGCT
pVvWOX9_CS      AGATGGGAAAGACTGTTTATTAATTGAAATAAACTGAACACAGGGGTAGGTGAGGAGGCT
*****

pVvWOX9_CH      ATAAGAAGAGATGTGATGTTGGCTAGAGGCTTTCAGTACCAAAAACAAGGCAACAAAA
pVvWOX9_CS      ATAAGAAGAGATGTGATGTTGGCTAGAGGCTTTCAGTACCAAAAACAAGGCAACAAAA
*****

pVvWOX9_CH      GGGCTTTGCTCCGTTGTTGTTGTTTCTCTTCTGGTTGGCTACTTTAGATATTTCATATCT
pVvWOX9_CS      GGGCTTTGCTCCGTTGTTGTTGTTTCTCTTCTGGTTGGCTACTTTAGATATTTCATATCT
*****

pVvWOX9_CH      ACATAGCTGCTGGTCTGCCCTCCCATCATCATCATC
pVvWOX9_CS      ACATAGCTGCTGGTCTGCCCTCCCATCATCATCATC
*****

```

-1

Percentage of identity between the two sequences: 99.2%.

**pVvWOX13C**

pVvWOX13C\_CH CATGGATCTTCATGTGTGGTTTCAGTCATGATGCAGGCCTAACCTTTAGTGAAGCACTAA  
pVvWOX13C\_CS CATGGATCTTCATGTGTGGTTTCAGTCATGATGCAGGCCTAACCTTTAGTGAAGCACTAA  
\*\*\*\*\*

pVvWOX13C\_CH TAGAAGGTGGATGTCACTTCACCGCAATTTGACTGAAGCAGGCTAAAAGAGTGAATTAGC  
pVvWOX13C\_CS TAGAAGGTGGATGTCACTTCACCGCAATTTGACTGAAGCAGGCTAAAAGAGTGAATTAGC  
\*\*\*\*\*

pVvWOX13C\_CH AGCTCTAGATCCAAAGAAACAGTGGAAAGTAGGTGGAAAAGCTAGAGACAAAAAGATAT  
pVvWOX13C\_CS AGCTCTAGATCCAAAGAAACAGTGGAAAGTAGGTGGAAAAGCTAGAGACAAAAAGATAT  
\*\*\*\*\*

pVvWOX13C\_CH TGAAAAGAAACATCTTTTGAAGATCTGCCACTAGCTTTAGAAATCTTGTGGAATCCGCAA  
pVvWOX13C\_CS TGAAAAGAAACATCTTTTGAAGATCTGCCACTAGCTTTAGAAATCTTGTGGAATCCGCAA  
\*\*\*\*\*

pVvWOX13C\_CH GAAATCGTAGAAAAATTGTCCACTTCGGACTATTGGGATAGCTATTTGAGGCTCAACAT  
pVvWOX13C\_CS GAAATCGTAGAAAAATTGTCCACTTCGGACTATTGGGATAGCTATTTGAGGCTCAACAT  
\*\*\*\*\*

pVvWOX13C\_CH GCCCGTCTCTAATTGTGTAGATTGGCGTTAGGAGTCATGTTAGGTACACCAAATTGTCC  
pVvWOX13C\_CS GCCCGTCTCTAATTGTGTAGATTGGCGTTAGGAGTCATGTTAGGTACACCAAATTGTCC  
\*\*\*\*\*

pVvWOX13C\_CH AATCCAAGGAAGAAAAACAAGACATACTGACGCCACATATCCCATTTTGAATGGTGTATC  
pVvWOX13C\_CS AATCCAAGGAAGAAAAACAAGACATACTGACGCCACATATCCCATTTTGAATGGTGTATC  
\*\*\*\*\*

pVvWOX13C\_CH ACCACCATCCCCACCCCACTGTAGTCCCCTCACAATC- AACACTTCCTTCTCCAAACC  
pVvWOX13C\_CS ACCACCATCCCCACCCCACTGTAGTCCCCTCACAATC- AACACTTCCTTCTCCAAACC  
\*\*\*\*\*

pVvWOX13C\_CH CTTAGCAGGAATCCTACTGTGGCCAACTGTGTAATAAGAAGATTAGAAAAACACGAGT  
pVvWOX13C\_CS CTTAGCAGGAATCCTACTGTGGCCAACTGTGTAATAAGAAGATTAGAAAAACACGAGT  
\*\*\*\*\*

pVvWOX13C\_CH TGGGCTCAGAGACAGACCGAGTTATTGAGGGTGGATGGTGA- GATGGAGGAGTACATCTG  
pVvWOX13C\_CS TGGGCTCAGAGACAGACCGAGTTATTGAGGGTGGATGGTGA- GATGGAGGAGTACATCTG  
\*\*\*\*\*

pVvWOX13C\_CH CA- - - - - CATGCCCATGCCATGTGCGTCATGTTCCACATCTTCACTTTCAAACAATAT  
pVvWOX13C\_CS CA- CATGCCCATGCCATGTGCGTCATGTTCCACATCTTCACTTTCAAACAATAT  
\*\* \*\*\*\*\*

pVvWOX13C\_CH AATGATTAATCAGAATAAGGTGAATAGCTATAGTTGAAACTTGAACCAGAACACTTGTG  
pVvWOX13C\_CS AATGATTAATCAGAATAAGGTGAATAGCTATAGTTGAAACTTGAACCAGAACACTTGTG  
\*\*\*\*\*

pVvWOX13C\_CH AGCCCTGCAGACGCGTCAGAGACCAACTCCCCTCCCCCATTCTAATTTCAAAGGGGTT  
pVvWOX13C\_CS AGCCCTGCAGACGCGTCAGAGACCAACTCCCCTCCCCCATTCTAATTTCAAAGGGGTT  
\*\*\*\*\*

pVvWOX13C\_CH TAATCACATTTAGTCTAATCAATGACCCACCCCATGACCCACCCCAATAGTATAAACACA  
pVvWOX13C\_CS TAATCACATTTAGTCTAATCAATGACCCACCCCATGACCCACCCCAATAGTATAAACACA  
\*\*\*\*\*

pVvWOX13C\_CH TCATTAGGTCAAGGACCCTGTTTCATTAATCACTCTCCTCTTCGTCTCATCTGCCAAATGC  
pVvWOX13C\_CS TCATTAGGTCAAGGACCCTGTTTCATTAATCACTCTCCTCTTCGTCTCATCTGCCAAATGC  
\*\*\*\*\*

pVvWOX13C\_CH ATGTAAGTCAAGGGCATCTCTTCTTGTCTTCTAAATGACAACCTTCTTATTAACCTCTTTC  
pVvWOX13C\_CS ATGTAAGTCAAGGGCATCTCTTCTTGTCTTCTTCTAAATGACAACCTTCTTATTAACCTCTTTC  
\*\*\*\*\*

pVvWOX13C\_CH TTCTTTAAAGATTTCTCACTTTGTACAAGGTGGAAAGTTGCATCTTCCCATGTGAGTTTA

pVvWOX13C\_CS TTCTTTAAAGATTTCTCACTTTGTACAAGGTGGAAAGTTGCATCTTCCCATGTGAGTTTA  
\*\*\*\*\*

pVvWOX13C\_CH TGATTCCATGCCAAGAATTTTGTACTCTTGACCTGCTTCAAATCAATCTACAATACACTG  
pVvWOX13C\_CS TGATTCCATGCCAAGAATTTTGTACTCTTGACCTGCTTCAAATCAATCTACAATACACTG  
\*\*\*\*\*

pVvWOX13C\_CH GATACATACATTGGATACCCACTCAGTAGCTCAGTAGCTCATGTACATGAAATGTCAACA  
pVvWOX13C\_CS GATACATACATTGGATACCCACTCAGTAGCTCAGTAGCTCATGTACATGAAATGTCAACA  
\*\*\*\*\*

pVvWOX13C\_CH TGGGAACCTTAATTCGGCCAAAATTCAAACCTCTTGGTGATTGTATATTTTATTAATTAAG  
pVvWOX13C\_CS TGGGAACCTTAATTCGGCCAAAATTCAAACCTCTTGGTGATTGTATATTTTATTAATTAAG  
\*\*\*\*\*

pVvWOX13C\_CH TAATATAACAAATCTTGTAATTTAAAAGTGTAGGTTTGAATTTAGCAAGGGTGAGAGGC  
pVvWOX13C\_CS TAATATAACAAATCTTGTAATTTAAAAGTGTAGGTTTGAATTTAGCAAGGGTGAGAGGC  
\*\*\*\*\*

pVvWOX13C\_CH ACGTGCACGTGGGTAGGGTGGAAATGGAAGAATGAAAGCAGGCGCCATTAAATCCTGGT  
pVvWOX13C\_CS ACGTGCACGTGGGTAGGGTGGAAATGGAAGAATGAAAGCAGGCGCCATTAAATCCTGGT  
\*\*\*\*\*

pVvWOX13C\_CH AATAACGCCAGAATGGTGCTCCCAACAGCACCTGAATCTGAAGTTTTTCCCATTTATGTA  
pVvWOX13C\_CS AATAACGCCAGAATGGTGCTCCCAACAGCACCTGAATCTGAAGTTTTTCCCATTTATGTA  
\*\*\*\*\*

pVvWOX13C\_CH GATTGTCAGACACCCACTGCCCAAACATTCATTCAGCCATGATCCATTCTCACGCAACC  
pVvWOX13C\_CS GATTGTCAGACACCCACTGCCCAAACATTCATTCAGCCATGATCCATTCTCACGCAACC  
\*\*\*\*\*

pVvWOX13C\_CH CCATTAATCACCTGCTCCGCCCCCTCTCCATGCCCCACTACTTCCACATATCATTAGTA  
pVvWOX13C\_CS CCATTAATCACCTGCTCCGCCCCCTCTCCATGCCCCACTACTTCCACATATCATTAGTA  
\*\*\*\*\*

pVvWOX13C\_CH TGTATATTTTTTTATTTCTTAAACCCACATGGACATGATGGGACGCTTGGCTTTGAATG  
pVvWOX13C\_CS TGTATATTTTTTTATTTCTTAAACCCACATGGACATGATGGGACGCTTGGCTTTGAATG  
\*\*\*\*\*

pVvWOX13C\_CH GGGGCCAATGAACATAAACGAGGGTACATGGAGTGGGGTGGTGGTGAGGAGCAGAGGATG  
pVvWOX13C\_CS GGGGCCAATGAACATAAACGAGGGTACATGGAGTGGGGTGGTGGTGAGGAGCAGAGGATG  
\*\*\*\*\*

pVvWOX13C\_CH AGGTTTTGATTGAGAGACGTGGGAAGCGTGGTGTCCCATCGTATCCAGGCCAATTTTAC  
pVvWOX13C\_CS AGGTTTTGATTGAGAGACGTGGGAAGCGTGGTGTCCCATCGTATCCAGGCCAATTTTAC  
\*\*\*\*\*

pVvWOX13C\_CH AAAGACACAAGCCCTGTGTATCTTTGAATATTACTTGCATAATATCGTGATATTTGAGT  
pVvWOX13C\_CS AAAGACACAAGCCCTGTGTATCTTTGAATATTACTTGCATAATATCGTGATATTTGAGT  
\*\*\*\*\*

pVvWOX13C\_CH TCTGCAATCAAGAATGGTCCAGCTGCATGGCAAAGTGAATCTAAGTTCTCAAAGCCCT  
pVvWOX13C\_CS TCTGCAATCAAGAATGGTCCAGCTGCATGGCAAAGTGAATCTAAGTTCTCAAAGCCCT  
\*\*\*\*\*

pVvWOX13C\_CH TATAAAATAATATTAACCTTATGTGTGTTTTTATTTTATTTTATTTTATTTTATTT  
pVvWOX13C\_CS TATAAAATAATATTAACCTTATGTGTGTTTTTATTTTATTTTATTTTATTTTATTT  
\*\*\*\*\*

pVvWOX13C\_CH TATTTTATGAGAATTTAGAAAATAAAAACTAAAAATAAAAAATAAATAAAAAATTAATA  
pVvWOX13C\_CS TATTTTATGAGAATTTAGAAAATAAAAACTAAAAATAAAAAATAAATAAAAAATTAATA  
\*\*\*\*\*

pVvWOX13C\_CH TATGGTAGGTTTTAAGTGTGAGTGCCTGTGTGTTTTTTTTTGGAAAGATTGATGTGGGTGTT  
pVvWOX13C\_CS TATGGTAGGTTTTAAGTGTGAGTGCCTGTGTGTTTTTTTTTGGAAAGATTGATGTGGGTGTT  
\*\*\*\*\*

pVvWOX13C\_CH TTATCATGAACCGAGAAAATGGACGTGTGAAAACGCGCATGAGACACATGCCCATGCTAA  
pVvWOX13C\_CS TTATCATGAACCGAGAAAATGGACGTGTGAAAACGCGCATGAGACACATGCCCATGCTAA

```

*****
pVvWOX13C_CH   AGTACGCCCCAGGAGGAGAGTACACTAACATACACCATCTTTTTCGTGGTTTCCTTTTTA
pVvWOX13C_CS   AGTACGCCCCAGGAGGAGAGTACACTAACATACACCATCTTTTTCGTGGTTTCCTTTTTA
*****

pVvWOX13C_CH   CCTTTTGGTGTGTGTAAACACTACTCAGTGCTGACTTTGTTAGAGAGATGGAGAGAGAGT
pVvWOX13C_CS   CCTTTTGGTGTGTGTAAACACTACTCAGTGCTGACTTTGTTAGAGAGATGGAGAGAGAGT
*****

pVvWOX13C_CH   AACGAGAGCGAGAGAGGAGGAGAAGAAGAGAGT
pVvWOX13C_CS   AACGAGAGCGAGAGAGGAGGAGAAGAAGAGAGT
*****

```

-1

Percentage of identity between the two sequences: 98.9%.

```

-792                                CAATBOX1 WBOXNTERF3                                CAATBOX1 -733
pVvWOX4_CH                          GCCAATCAGTGAAGAAGAAGCTGTGATTGCGGTCATCAGGACAACCTGTAACAATAGCTTT
pVvWOX4_CS                          GCCAATCAGTGAAGAAGAAGC-----
*****

-732 ACTFTPPCA1                    CAATBOX1                                -673
pVvWOX4_CH                          ACTCAAGACTTGATCATATATTGTGTGAAAAGACAATAAGATAAATTTACCCCATGTAAAA
pVvWOX4_CS                          -----TGTGAAAAGACAATAAGATAAATTTACCCCATGTAAAA
*****

-592                                -533
pVvWOX4_CH                          ACAAAAATGAGATGAAAAGTGGGGTTGATGGGTTTATACTATTTGGGAAATTGGAGCTAC
pVvWOX4_CS                          ACAAAAATGAGATGAAAAGTGTGAGGGTTGATGGGTTTATACTATTTGGGAAATTGGAGCTAC
*****
GTGANTG10

-492 GT1GMSCAM4                    -433
pVvWOX4_CH                          TTTTTTTTCTCCTTTTTCTTTTTTTTCAACATTCCTACCCTTAAAGACGGCCTTCAGTTC
pVvWOX4_CS                          TTTTCT---CCTTTTCTTTTTTTTCAACATTCCTACCCTTAAAGACGGCCTTCAGTTC
***** *

-----

-898                                -839
pVvWOX6_CH                          GATTGTTATAAGTAGAGATTATGATCTATGATGCTAGATTCGCATATATGTTCCGTGCAT
pVvWOX6_CS                          GATTGTTATAAGTAGAGATTATGATCTATGATGCTAGATTCGCATATATTATTCCGTGCAT
*****
ROOTMOTIFTAPOX1

-538                                SURECOREATSULTR11                    -479
pVvWOX6_CH                          ATGATTAGCGGACACAAAAAGGCTAGAAGTCTCCATTTTCAAATGGGAACAAAAA-
pVvWOX6_CS                          ATGATTAGCGGACACAAAAAGGCTAGAAAGACACCATTTTCAAATGGGAACAAAAAAAA
*****
DOFCOREZM

-478                                -419
pVvWOX6_CH                          -AAAGGGGGGAGGAAATGAAGGAAAAAGGATAAAGAATGAGAGAGAAAGATGGGGTTGT
pVvWOX6_CS                          GAAAAGGGGGAGGAAATGAAGGAAAAAGGATAAAGAATGAGAGAGAAAGATGGGGTTGT
***
GT1CONSENSUS

-235                                SURECOREATSULTR11                    -179
pVvWOX6_CH                          TTGTTACTACATACCCCGTCTCTCTCACAAATTCATAAATAAGAGACCATGGTCAACCTAC
pVvWOX6_CS                          TTGTTACTACATACCCCGTCTCTCTCACAAATTCATAAATAAGAGAGCATGGTCAACCTAC
*****

-----

-1174                               CACTFTPPCA1 QELEMENTZM13            CAATBOX1 -1114
pVvWOX13C_CH                        TGATTCCATGCCAAGAATTTTGACTCTTGACCTGCTTCAAATCAATCTACAATACACTG
pVvWOX13C_CS                        TGATTCCATGCCAAGAATTTTGTCTCTTGACCCCGCTTCAAATCAGTCTACAATACACTG
*****
BS1EGCCR

-393                                MARTBOX                                -334
pVvWOX13C_CH                        TATAAAAAAATATTAATACTTATGTGTGTTTTTATTTTATTTTATTTTATTTATTTTATTT
pVvWOX13C_CS                        TATAAATAAATATAAAGCTTATGTGTGTTTTTATTTTATTTTAAATTTAATTTATTT
*****
TATABOX2 TAAAGSTKST1

-333                                EECRCRH1                                POLASIG3 -274
pVvWOX13C_CH                        TATTTTATGAAATTTCAGAAATAAAAACTAAAAATAAAAA-AATAATAAAAATTAATA
pVvWOX13C_CS                        TATTTTATGAAATTTGAGAAATAAAAACTAAAAATAAAAATAAAAATTAATA
*****
EF4MOTIFGM7S

```

**Supplementary Figure S2.** Parts of the nucleotide sequences of *pVvWOX4*, *pVvWOX6* and *pVvWOX13C* isolated from ‘Chardonnay’ (CH) and ‘Cabernet Sauvignon’ (CS). The underlined sequences are transcription factor binding sites (TFBSs) present only in CH or CS and which were associated with point mutations and deletions. For details of TFBSs see Supplementary Table S1.

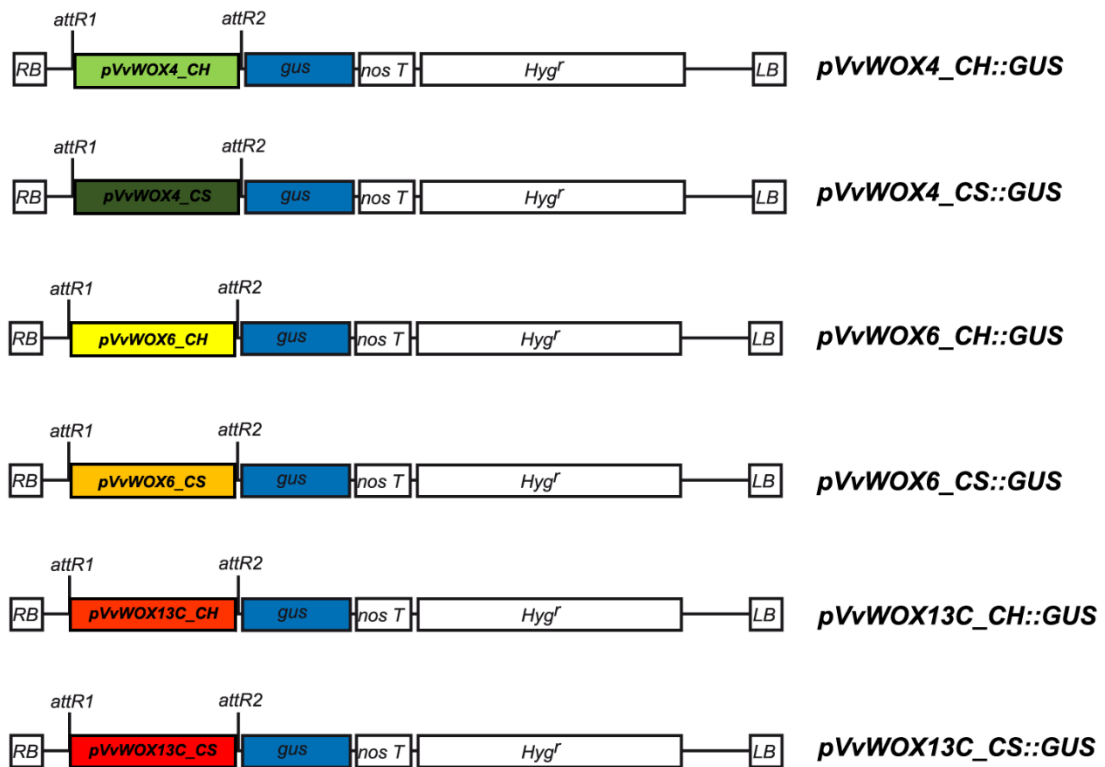

**Supplementary Figure S3.** Schematic representation of promoter::*GUS* fusion constructs inserted in expression vector pMDC164. RB: right border; attR1 and attR2: recombination sites for Gateway® Technology; *GUS*:  $\beta$ -glucuronidase gene; nosT: nos terminator; *Hyg<sup>r</sup>*: Hygromycin resistance gene; LB: left border. *pVvWOX4\_CH*: promoter of *VvWOX4* isolated from ‘Chardonnay’ (CH). *pVvWOX4\_CS*: promoter of *VvWOX4* isolated from ‘Cabernet Sauvignon’ (CS). *pVvWOX6\_CH*: promoter of *VvWOX6* isolated from ‘Chardonnay’ (CH). *pVvWOX6\_CS*: promoter of *VvWOX6* isolated from ‘Cabernet Sauvignon’ (CS). *pVvWOX13C\_CH*: promoter of *VvWOX13C* isolated from ‘Chardonnay’ (CH). *pVvWOX13C\_CS*: promoter of *VvWOX13C* isolated from ‘Cabernet Sauvignon’ (CS).

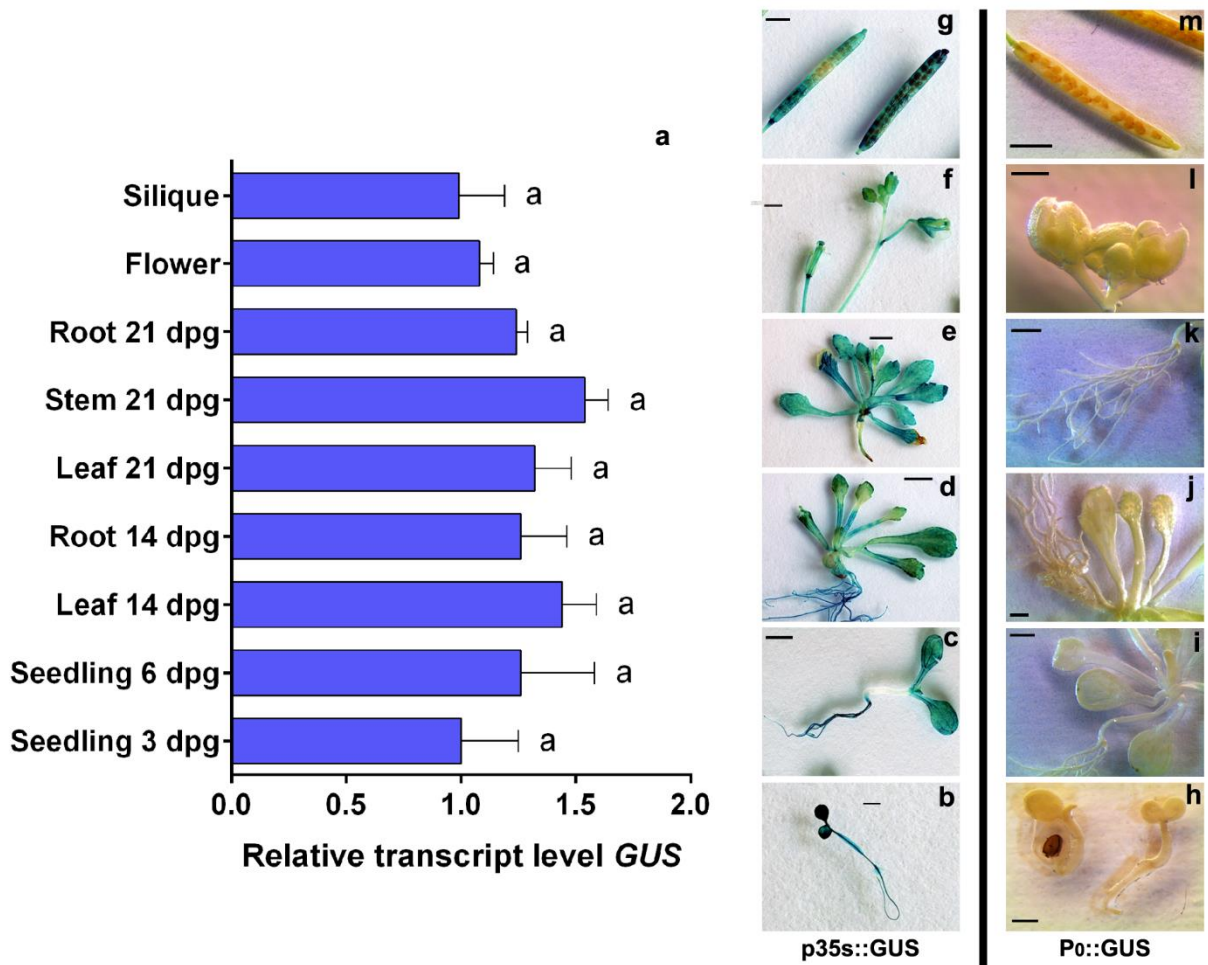

**Supplementary Figure S4.** Characterisation of *p35S::GUS* and empty vector without promoter (*p0::GUS*) in *Arabidopsis thaliana*. a) Relative expression level of *GUS* under control of *p35S* in transgenic *Arabidopsis* organs collected in different developmental stages. Lowercase letters denote significant differences attested by Tukey's HSD test ( $P < 0.05$ ). Data are expressed as means  $\pm$  SE ( $n = 3$ ). b-m) Histochemical assay for *GUS* expression in transgenic *Arabidopsis* organs. Data shown are representative of three independent transgenic lines. Size bar = 2 mm.

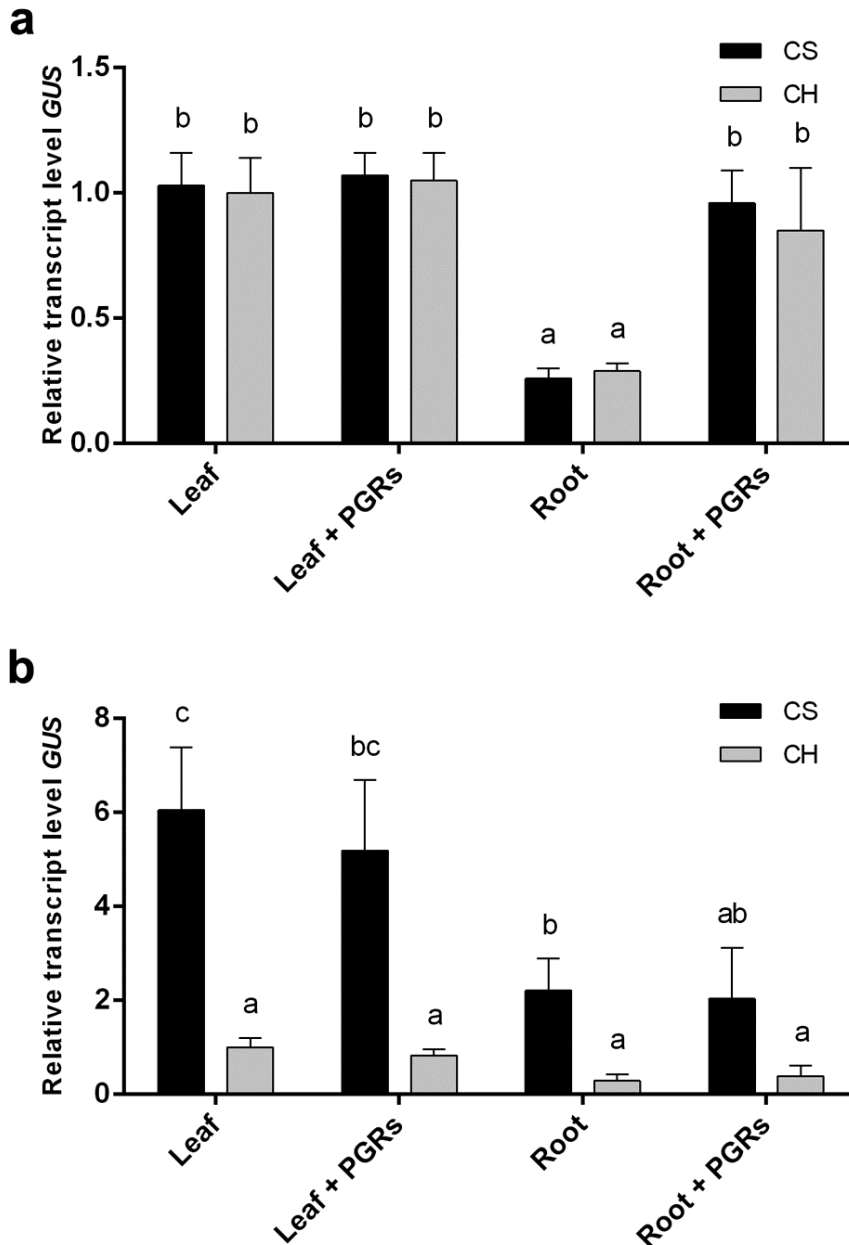

**Supplementary Figure S5.** Relative expression level of *GUS* under control of promoters: a) *pVvWOX4\_CH* and *pVvWOX4\_CS*; b) *pVvWOX13C\_CH* and *pVvWOX13C\_CS* in transgenic *Arabidopsis*. The organs were collected in standard culture conditions (leaf and root) and after 8 days of culture with the plant growth regulators 2,4 D and BA (leaf + PGR and root + PGR). Lowercase letters denote significant differences attested by Tukey's HSD test ( $P < 0.05$ ). Data are expressed as means  $\pm$  SE ( $n = 3$ ).



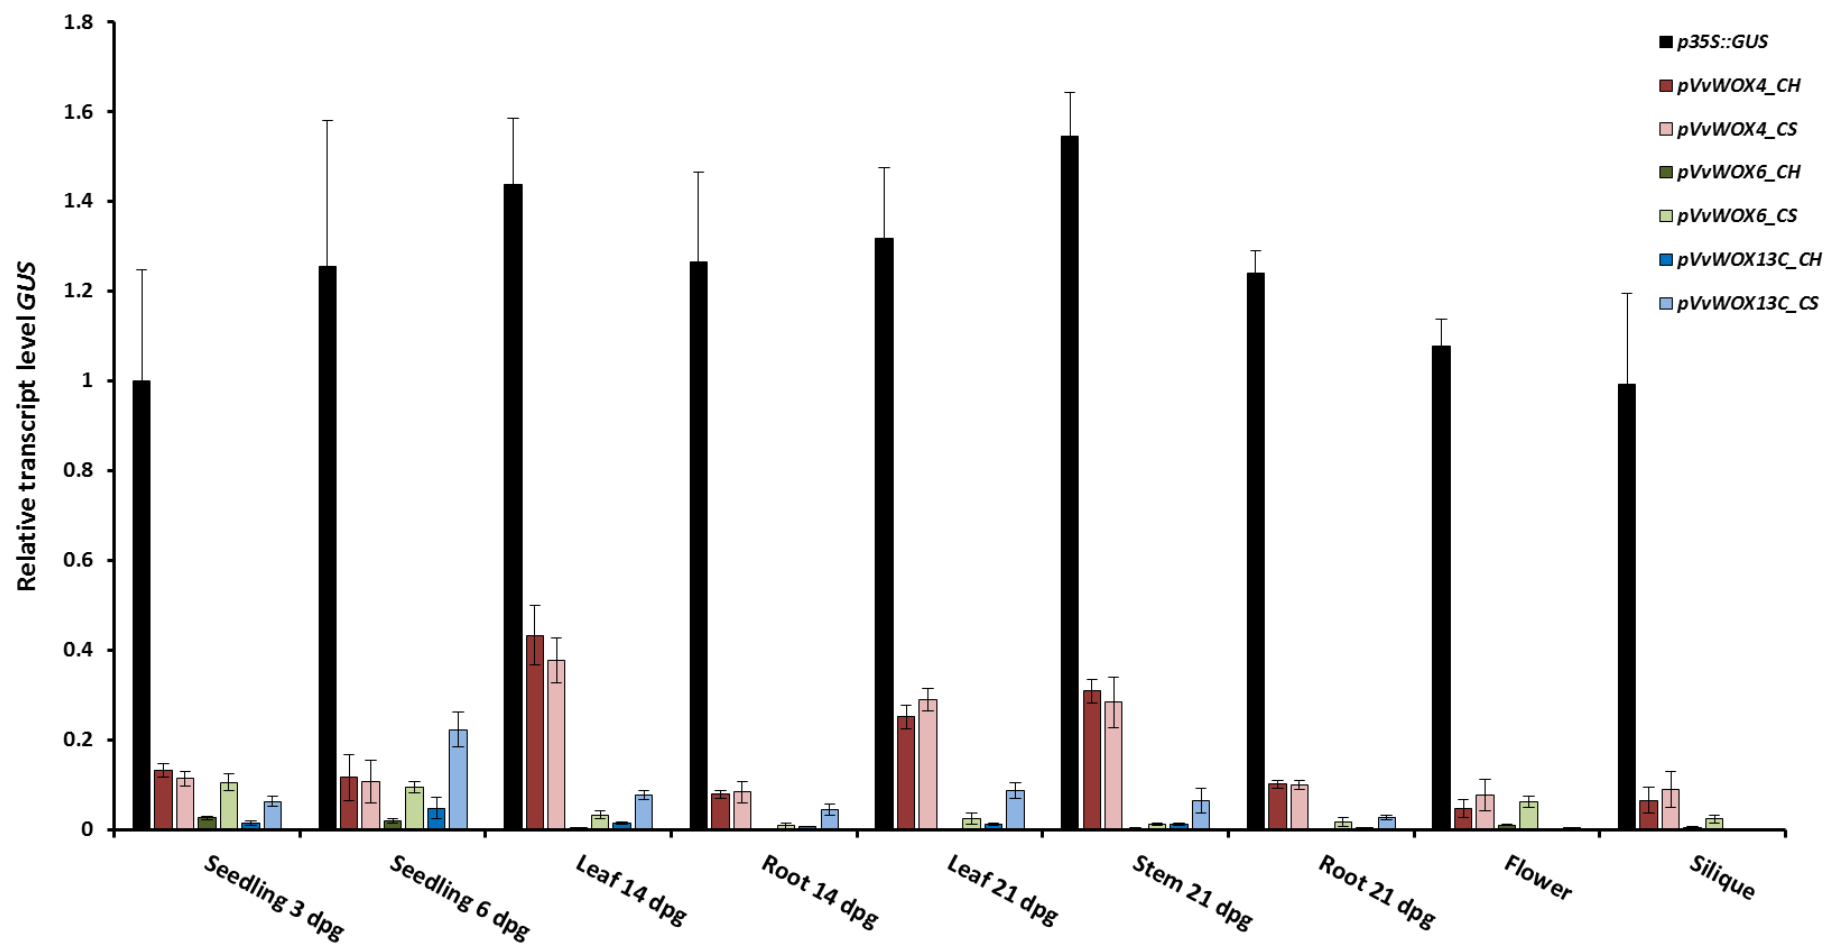

**Supplementary Figure S6.** Relative expression level of *GUS* under control of promoters: *p35S*, *pVvWOX4\_CH*, *pVvWOX4\_CS*, *pVvWOX6\_CH*, *pVvWOX6\_CS*, *pVvWOX13C\_CH* and *pVvWOX13C\_CS* in transgenic *Arabidopsis*. All data refer to seedling at 3 dpg transformed with *p35S::GUS*. Data are expressed as means  $\pm$  SE (n = 3).
